# Supplementary material for: Mitomycin C treatment induces resistance and enhanced migration via phosphorylated Akt in aggressive lung cancer cells
Source: PubMed Central journal article supplement (PMC5346766; doi:10.18632/oncotarget.13237), 2016-11-09
Supplement: oncotarget-07-79995-s001.pdf [file oncotarget-07-79995-s001.pdf]

## Mitomycin C treatment induces resistance and enhanced migration via phosphorylated Akt in aggressive lung cancer cells

### SUPPLEMENTARY FIGURES

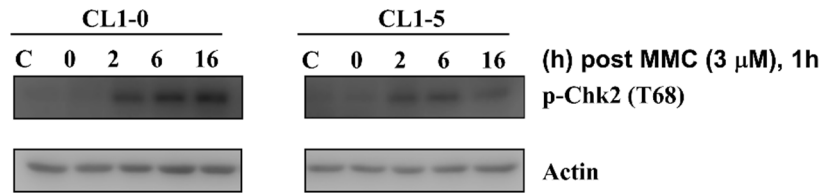

**Supplementary Figure S1:** Immunoblot analysis of p-Chk2 (T68) in CL1-0 and CL1-5 cells at the indicated time points post 3 μM MMC treatment. C: control, cells without MMC treatment. Loading control: actin.

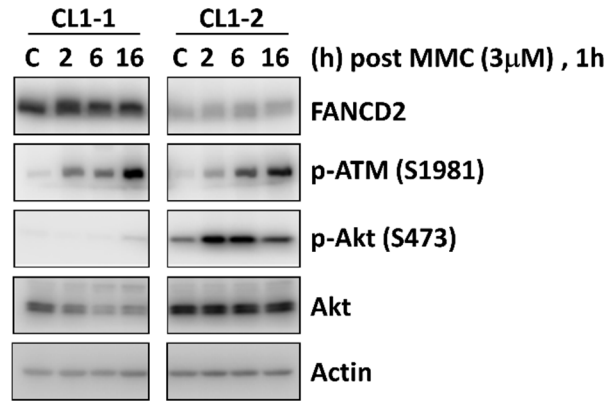

Supplementary Figure S2: Immunoblot analysis of FANCD2, p-ATM (S1981), p-Akt (S473), and Akt in CL1-1 and CL1-2 cells at the indicated time points post 3  $\mu$ M MMC treatment. Loading control: actin.
